# Supplementary material for: Assessing the sources and dynamics of organic matter in a high human impact bay in the northern Beibu Gulf: Insights from stable isotopes and optical properties
Source: Frontiers journal article supplement (doi:10.3389/fmars.2022.1043278), 2022-11-22
Supplement: Table_2.XLSX [file Table_2.XLSX]

## Sheet: Sheet1
Station	Longitude [degrees_east]	Latitude [degrees_north]	Bot. Depth [m]	Depth [m]	a280(m-1)	a350(m-1)	a355(m-1)	a412(m-1)
W2	108.322	21.6628	1.3	0.5	2.21088	0.64484	0.59878	0.2303
W3	108.325	21.6515	1.6	0.5	1.81937	0.52969	0.48363	0.18424
W4	108.341	21.6595	2	0.5	2.39512	0.71393	0.64484	0.25333
W1	108.35	21.6625	2.6	0.5	1.93452	0.57575	0.52969	0.20727
W5	108.344	21.6515	3	0.5	2.97087	0.85211	0.78302	0.29939
W6	108.333	21.6386	3	0.5	2.39512	0.6909	0.64484	0.25333
W7	108.328	21.6429	2.3	0.5	2.67148	0.73696	0.6909	0.27636
W8	108.341	21.6416	3	0.5	2.87875	0.82908	NA	0.29939
W9	108.327	21.6349	4.3	0.5	3.10905	0.89817	NA	0.32242
W10	108.339	21.6319	3.4	0.5	2.7636	0.80605	NA	0.27636
W11	108.328	21.6205	6.3	0.5	1.81937	0.52969	NA	0.18424
W12	108.321	21.6064	9.5	0.5	2.62542	0.75999	NA	0.27636
W13	108.327	21.5808	7.2	0.5	3.40844	0.94423	NA	0.32242
W14	108.325	21.5519	3.5	0.5	4.81327	1.33574	NA	0.48363
NA: not available.
